# Supplementary material for: Transcriptomic characterization reveals prognostic molecular signatures of sorafenib resistance in hepatocellular carcinoma
Source: PubMed Central journal article supplement (PMC7906139; doi:10.18632/aging.202365), 2021-01-20
Supplement: aging-13-202365-s001.pdf [file aging-13-202365-s001.pdf]

## SUPPLEMENTARY FIGURE

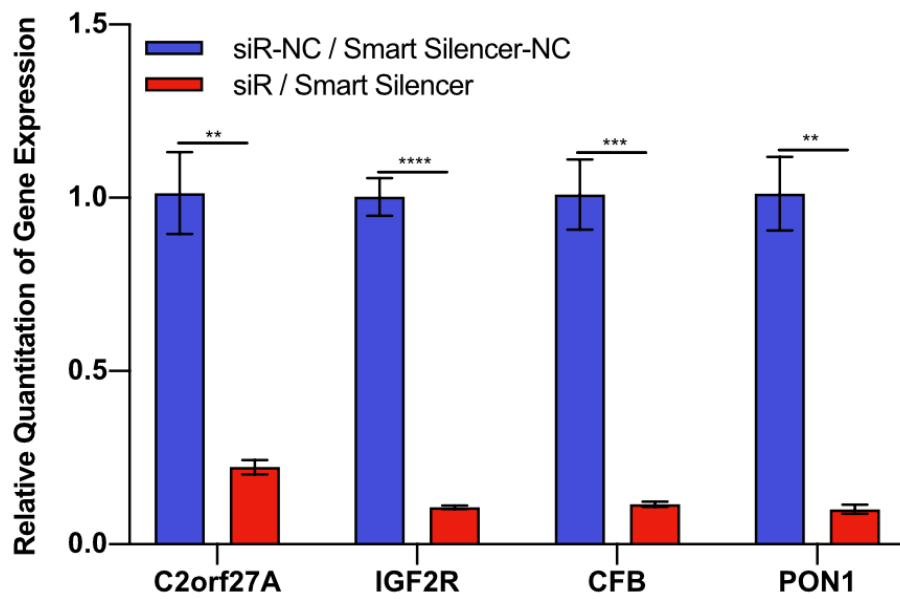

**Supplementary Figure 1. Four selected genes were knocked down by transfection with siRNA or lncRNA smart silencer - Four selected genes were knocked down by transfection with siRNA or lncRNA smart silencer.** The gene expression of C2orf27A, IGF2R, CFB, and PON1 in Huh7 cells after RNA interference.
