# Supplementary material for: Transcriptomic characterization reveals prognostic molecular signatures of sorafenib resistance in hepatocellular carcinoma
Source: PubMed Central journal article supplement (PMC7906139; doi:10.18632/aging.202365), 2021-01-20
Supplement: aging-13-202365-s002.pdf [file aging-13-202365-s002.pdf]

## SUPPLEMENTARY TABLES

Supplementary Table 1. Cox regression analysis.

|                           | Univariate   |                  |              | Multivariate |                  |              |
|---------------------------|--------------|------------------|--------------|--------------|------------------|--------------|
|                           | Hazard_ratio | CI95             | p_values     | Hazard_ratio | CI95             | p_values     |
| Age                       | 1.01         | 1-1.03           | 0.066        |              |                  |              |
| Gender                    | 0.82         | 0.58-1.17        | 0.284        |              |                  |              |
| Race                      | 1.14         | 0.95-1.37        | 0.166        |              |                  |              |
| Family_History            | 1.16         | 0.81-1.68        | 0.418        |              |                  |              |
| BMI                       | 1            | 0.97-1.03        | 0.995        |              |                  |              |
| Ethnicity                 | 1.11         | 0.49-2.52        | 0.811        |              |                  |              |
| Fibrosis_Stage            | 1.18         | 0.87-1.6         | 0.287        |              |                  |              |
| Child_Pugh_Classification | 1.52         | 0.84-2.77        | 0.17         |              |                  |              |
| <b>Tumor_Stage</b>        | <b>1.64</b>  | <b>1.34-2.01</b> | <b>0</b>     | <b>0.8</b>   | <b>0.34-1.87</b> | <b>0.611</b> |
| <b>Pathologic_T</b>       | <b>1.63</b>  | <b>1.37-1.94</b> | <b>0</b>     | <b>1.95</b>  | <b>0.87-4.34</b> | <b>0.103</b> |
| <b>Pathologic_N</b>       | <b>1.22</b>  | <b>1.01-1.46</b> | <b>0.037</b> | <b>1.07</b>  | <b>0.81-1.4</b>  | <b>0.637</b> |
| <b>Pathologic_M</b>       | <b>1.26</b>  | <b>1.05-1.52</b> | <b>0.012</b> | <b>1.24</b>  | <b>0.95-1.63</b> | <b>0.11</b>  |
| Radiation_Therapy         | 0.84         | 0.21-3.42        | 0.808        |              |                  |              |
| Vascular_Invasion         | 0.74         | 0.53-1.02        | 0.069        |              |                  |              |
| BMS1P1                    | 1.19         | 0.59-2.4         | 0.622        |              |                  |              |
| <b>C2orf27A</b>           | <b>2.13</b>  | <b>1.51-2.99</b> | <b>0</b>     | <b>1.5</b>   | <b>0.99-2.27</b> | <b>0.057</b> |
| <b>CFB</b>                | <b>0.85</b>  | <b>0.75-0.97</b> | <b>0.017</b> | <b>1</b>     | <b>0.85-1.18</b> | <b>0.979</b> |
| COL1A2                    | 1.06         | 0.95-1.17        | 0.291        |              |                  |              |
| CST3                      | 1.2          | 0.97-1.48        | 0.091        |              |                  |              |
| CYP4F30P                  | 116840.6     | 0-4.11e13        | 0.245        |              |                  |              |
| DEFB122                   | 2384.77      | 0.03-2.03e8      | 0.179        |              |                  |              |
| GPER1                     | 0.96         | 0.81-1.13        | 0.6          |              |                  |              |
| <b>IGF2R</b>              | <b>1.28</b>  | <b>1.01-1.63</b> | <b>0.041</b> | <b>1.08</b>  | <b>0.83-1.4</b>  | <b>0.565</b> |
| OR2A20P                   | 5.13         | 0.3-86.48        | 0.256        |              |                  |              |
| PFN1P2                    | 0.33         | 0.07-1.45        | 0.141        |              |                  |              |
| <b>PON1</b>               | <b>0.85</b>  | <b>0.79-0.92</b> | <b>0</b>     | <b>0.88</b>  | <b>0.8-0.97</b>  | <b>0.01</b>  |
| ZNF826P                   | 1.35         | 0.99-1.83        | 0.057        |              |                  |              |
| ZSCAN12P1                 | 0.94         | 0.58-1.5         | 0.784        |              |                  |              |

**Supplementary Table 2. Correlation between selected genes and infiltrating immune cells in GSE109211.**

|                                | CFB   |      | IGF2R |      | PON1  |      | C2orf27A |      |
|--------------------------------|-------|------|-------|------|-------|------|----------|------|
|                                | r     | p    | r     | p    | r     | p    | r        | p    |
| Activated.CD4.T.cell           | -0.29 | 0.02 | 0.10  | 0.40 | -0.16 | 0.19 | 0.19     | 0.12 |
| Activated.CD8.T.cell           | 0.51  | 0.00 | 0.33  | 0.01 | 0.09  | 0.45 | 0.40     | 0.00 |
| Activated.dendritic.cell       | 0.43  | 0.00 | 0.34  | 0.00 | 0.20  | 0.11 | 0.09     | 0.46 |
| CD56bright.natural.killer.cell | 0.68  | 0.00 | 0.56  | 0.00 | 0.33  | 0.01 | 0.35     | 0.00 |
| Central.memory.CD4.T.cell      | 0.65  | 0.00 | 0.59  | 0.00 | 0.41  | 0.00 | 0.48     | 0.00 |
| Central.memory.CD8.T.cell      | 0.44  | 0.00 | 0.50  | 0.00 | 0.48  | 0.00 | 0.09     | 0.46 |
| Effector.memeory.CD4.T.cell    | -0.18 | 0.13 | -0.22 | 0.07 | -0.48 | 0.00 | 0.02     | 0.89 |
| Effector.memeory.CD8.T.cell    | 0.70  | 0.00 | 0.16  | 0.20 | 0.02  | 0.86 | 0.35     | 0.00 |
| Natural.killer.cell            | 0.70  | 0.00 | 0.14  | 0.27 | 0.04  | 0.75 | 0.35     | 0.00 |
| Natural.killer.T.cell          | -0.40 | 0.00 | -0.11 | 0.36 | -0.01 | 0.96 | -0.23    | 0.06 |
| Type.1.T.helper.cell           | 0.56  | 0.00 | 0.26  | 0.03 | 0.21  | 0.08 | 0.44     | 0.00 |
| Type.17.T.helper.cell          | -0.52 | 0.00 | -0.33 | 0.01 | -0.30 | 0.01 | -0.44    | 0.00 |
| CD56dim.natural.killer.cell    | 0.61  | 0.00 | 0.13  | 0.28 | 0.14  | 0.26 | 0.23     | 0.06 |
| Immature.dendritic.cell        | 0.24  | 0.05 | 0.50  | 0.00 | 0.48  | 0.00 | 0.30     | 0.01 |
| Macrophage                     | -0.35 | 0.00 | -0.30 | 0.01 | -0.09 | 0.46 | -0.06    | 0.62 |
| MDSC                           | 0.53  | 0.00 | 0.56  | 0.00 | 0.30  | 0.01 | 0.28     | 0.02 |
| Neutrophil                     | -0.50 | 0.00 | -0.33 | 0.01 | -0.16 | 0.19 | -0.21    | 0.09 |
| Plasmacytoid.dendritic.cell    | 0.68  | 0.00 | 0.66  | 0.00 | 0.47  | 0.00 | 0.32     | 0.01 |
| Regulatory.T.cell              | 0.56  | 0.00 | 0.13  | 0.31 | 0.01  | 0.95 | 0.38     | 0.00 |
| Type.2.T.helper.cell           | -0.46 | 0.00 | -0.17 | 0.17 | -0.15 | 0.22 | 0.02     | 0.86 |
| Activated.B.cell               | -0.42 | 0.00 | -0.67 | 0.00 | -0.60 | 0.00 | -0.10    | 0.41 |
| Eosinophil                     | 0.16  | 0.18 | 0.34  | 0.00 | 0.34  | 0.01 | 0.12     | 0.33 |
| Gamma.delta.T.cell             | 0.65  | 0.00 | 0.57  | 0.00 | 0.46  | 0.00 | 0.38     | 0.00 |
| Immature..B.cell               | -0.27 | 0.03 | -0.27 | 0.03 | -0.38 | 0.00 | -0.04    | 0.74 |
| Mast.cell                      | -0.16 | 0.20 | 0.02  | 0.86 | 0.02  | 0.85 | 0.00     | 0.99 |
| Memory.B.cell                  | 0.24  | 0.05 | -0.00 | 0.97 | -0.10 | 0.41 | 0.19     | 0.13 |
| Monocyte                       | 0.75  | 0.00 | 0.57  | 0.00 | 0.43  | 0.00 | 0.38     | 0.00 |
| T.follicular.helper.cell       | -0.22 | 0.08 | 0.32  | 0.01 | 0.16  | 0.19 | -0.21    | 0.09 |

**Supplementary Table 3. qRT-PCR primers.**

| <b>Genes</b>         | <b>Primers</b> | <b>Sequences (5' to 3')</b> |
|----------------------|----------------|-----------------------------|
| Homo <i>β-actin</i>  | Forward        | CACCAACTGGGACGACAT          |
|                      | Reverse        | ACAGCCTGGATAGCAACG          |
| Homo <i>C2orf27a</i> | Forward        | TCACGCTGCTGTGGAATAGAA       |
|                      | Reverse        | ATCAGAGGCTGCTGGGGAA         |
| Homo <i>IGF2R</i>    | Forward        | CACCAGGCGTTTGATGTTGG        |
|                      | Reverse        | TTTGGGAATGGTGCCCTCTC        |
| Homo <i>CFB</i>      | Forward        | TCTCTGTGGCATGGTTTGGG        |
|                      | Reverse        | CCATACAGCTCTCGTGTCCC        |
| Homo <i>PON1</i>     | Forward        | AGCGTGGTCGTATGTTGTCT        |
|                      | Reverse        | TGAGCCAGCAACTCAGCTAT        |

**Supplementary Table 4. Target sequences of siRNAs and lncRNA smart silencer.**

| <b>siRNAs</b>                         | <b>Target sequences</b> |
|---------------------------------------|-------------------------|
| siR- <i>IGF2R</i>                     | GCATCAAGATATCGACTCT     |
| siR- <i>CFB</i>                       | GTGGCAAGTTATGGTGTGA     |
| siR- <i>PON1</i>                      | GTCGTATGTTGTCTACTAT     |
| SmartSiliencer- <i>C2orf27A</i> (mix) |                         |
| ASO-h-C2orf27A_001                    | CCAAAGGTTTATGGCTGCAA    |
| ASO-h-C2orf27A_001                    | GAGAGTAACTTTGTACCCAT    |
| ASO-h-C2orf27A_001                    | ACCACAGTTACTTTATCCCT    |
| si-h-C2orf27A_001                     | TCATCTGCGTTGCTCTAAA     |
| si-h-C2orf27A_002                     | CCTCCAGTTCAACAGTAT      |
| si-h-C2orf27A_003                     | ACTGATTCCTCCGAGACT      |
